# Supplementary material
Source: publisher figshare collection journal article supplement (https://tandf.figshare.com/ndownloader/files/32516662)
Supplement: Supplementary file 1 [file 32516662]

Supplemental material

*Target volume modifications and doses to organs at risk*

*The distribution of manual modifications of CTV and PTV and doses to OARs exceeding constraints in different centres. Dose are analysed for the brainstem, chiasm, optic nerves, posterior and anterior eyes, thus doses to the brain, pituitary gland, and structures on the lower neck are not included. CTV: Clinical target volume, PTV: Planning target volume, NE: Not evaluated.*

|  | Center 1  n=51 (100) | Center 2  n=36 (100) | Center 3  n=45 (100) | Center 4  n=44 (100) | Center 5  n=8 (100) | Total  n=184 (100) |
| --- | --- | --- | --- | --- | --- | --- |
| *Target volume modification*  Total  CTV  PTV  CTV+PTV  NE | 28 (55)  2 (4)  22 (43)  1 (2)  3 (6) | 31 (86)  8 (22)  19 (53)  2 (5.5)  2 (5.5) | 16 (36)  8 (18)  5 (1)  0 (0)  3 (7) | 16 (36)  7 (16)  7 (16)  2 (5)  0 (0) | 1 (13)  0 (0)  1 (13)  0 (0)  3 (3) | 92 (50)  25 (14)  54 (29)  5 (3)  11 (6) |
| *OAR dose constraint violation*  Total  Brainstem  Chiasm  Optic nerve  Eye Back  Eye Front | 46 (90)  4 (8)  19 (37)  36 (71)  36 (71)  41 (80) | 25 (69)  0 (0)  5 (14)  17 (47)  23 (64)  23 (64) | 29 (64)  5 (11)  6 (13)  19 (43)  23 (51)  24 (53) | 23 (52)  3 (7)  4 (9)  15 (34)  17 (39)  17 (39) | 4 (8)  0 (0)  1 (13)  4 (50)  4 (50)  3 (38) | 127 (69)  12 (7)  35 (19)  91 (49)  103 (56)  108 (59) |
